# Supplementary material
Source: publisher figshare collection journal article supplement (https://tandf.figshare.com/ndownloader/files/22695371)
Supplement: Supplementary file 1 [file 22695371]

1 SUPPLEMENTARY MATERIAL

2 **Excluded patients**

3 One patient died immediately after treatment, before any follow-up was performed, and was thus  
4 excluded from the analysis. Six patients were lost to follow-up, as their local ophthalmologist  
5 maintained the regular control visits due to logistical and/or physical conditions. These were used in  
6 the analysis until the transfer of care and censored afterwards.

7

8 **Correlation analysis**

9 Correlation analysis showed a clear relationship between tumour height and tumour largest base  
10 dimension (Figure 4A). Based on clinical evaluation we kept tumour height in the model.

11 Tumour height, largest base dimension and plaque type all correlated closely, with the CCC plaque  
12 type used for the largest tumours, the CCA primarily used for smaller tumour sizes, and the CCB and  
13 the COB used for the remaining tumour sizes, depending on location within the globe. We chose to  
14 keep tumour height in the model.

15 Plaque type also correlated with optic disc-tumour and macula-tumour distance (Figure 4B). The COB  
16 plaque was used only for tumours within approximately 2 mm from each of the structures, while the  
17 remaining plaques were used for all distances. Based on clinical evaluation, we kept the optic disc-  
18 tumour distance in the model.

19 As expected, the AJCC stage and tumour height correlated strongly (Figure 4C). We performed the  
20 analyses separately with tumour height and stage since both were of clinical interest.

21

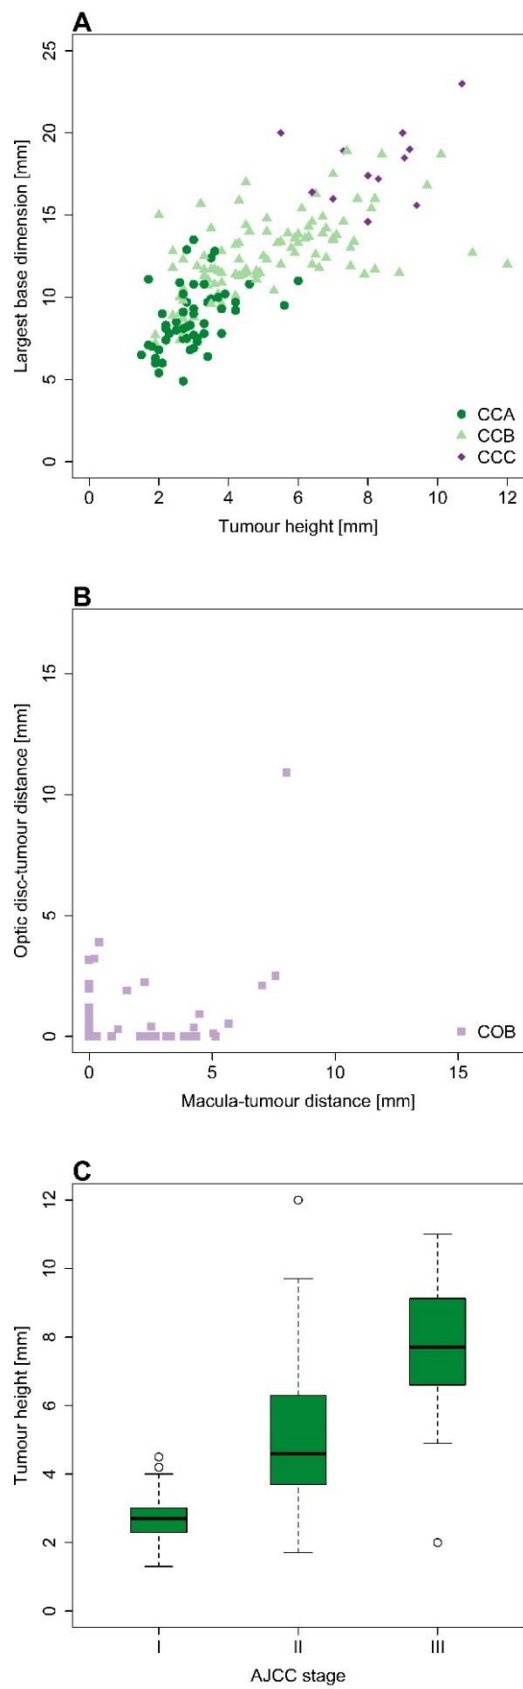

22

23 Figure 4: Correlation between clinical variables. A) Tumour height, tumour largest base dimension and

24 type of plaque correlated. CCA and CCB plaques were used for smaller and medium sized tumours,  
 25 while the CCC plaque was used only for large tumours. B) Macula-tumour distance correlated with  
 26 optic disc-tumour distance and plaque type with the COB plaque being used only for small distances  
 27 (primarily <2 mm from each of the structures). C) Tumour heights divided by AJCC stage.

28

29 **Local control estimates stratified for clinical factors**

30 Figure 5 illustrates Kaplan-Meier curves stratified for several different clinical factors.

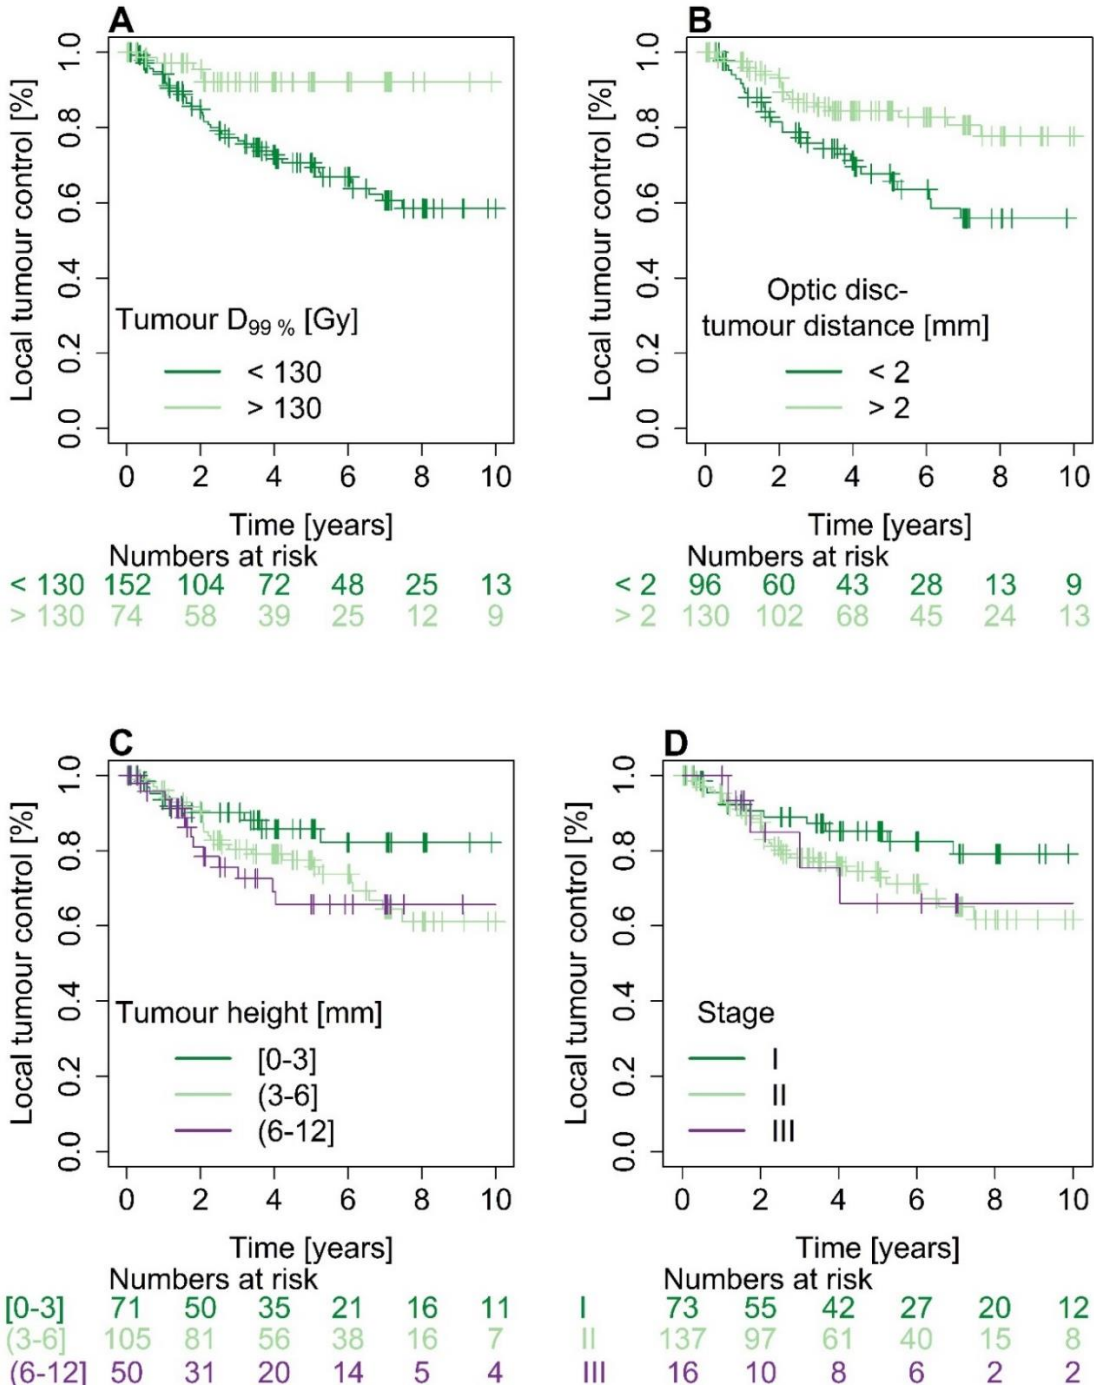

31

32 Figure 5: Kaplan-Meier curves showing probability of local tumour control for the population divided  
 33 into groups based on A) tumour doses, B) optic disc-tumour distances, C) tumour heights and D)  
 34 stages. Crosses represent censored patients.

35

36 **Modelling using AJCC stage**

37 The results from the analysis using AJCC stage as an alternative to tumour height but with all other  
 38 factors retained are listed in Table 3 and illustrated at 3 and 7 years after primary treatment in Figure  
 39 6A and Figure 6B. In the reduced model,  $D_{99\%}$  remained the most significant variable emphasizing the  
 40 robustness of  $D_{99\%}$  on the effect on local tumour control. Combined TTT and Ru-106 and sex also  
 41 remained significant.

42 Table 3: Cox proportional hazards from the reduced model using stage instead of tumour height

| <b>Variables in full model</b>    | <b>HR (95% CI)</b> | <b>p-value</b> |
|-----------------------------------|--------------------|----------------|
| Age                               | 1.02 (1.00-1.05)   | 0.09           |
| Sex (male relative to female)     | 2.32 (1.22-4.43)   | 0.01           |
| Eye (left relative to right)      | 0.99 (0.56-1.75)   | 0.97           |
| Tumour height                     | -                  | -              |
| Optic disc-tumour distance        | 0.92 (0.82-1.04)   | 0.19           |
| Stage II+III (relative to I)      | 3.73 (1.77-7.89)   | 0.0006         |
| $D_{99\%}$                        | 0.86 (0.80-0.92)   | $<10^{-4}$     |
| Combined TTT and Ru-106           | 2.67 (1.35-5.26)   | 0.005          |
| <b>Variables in reduced model</b> | <b>HR (95% CI)</b> | <b>p-value</b> |
| $D_{99\%}$                        | 0.85 (0.80-0.91)   | $<10^{-4}$     |
| Stage II+III (relative to I)      | 3.11 (1.50-6.44)   | 0.002          |
| Combined TTT and Ru-106           | 2.86 (1.49-5.51)   | 0.002          |
| Sex (male relative to female)     | 1.97 (1.07-3.63)   | 0.03           |

43 HR=hazard ratio, CI=confidence interval,  $D_{99\%}$ =minimum physical tumour dose, TTT=transpupillary  
 44 thermotherapy, Ru-106=Ruthenium-106. HRs for a 10 Gy increase in  $D_{99\%}$

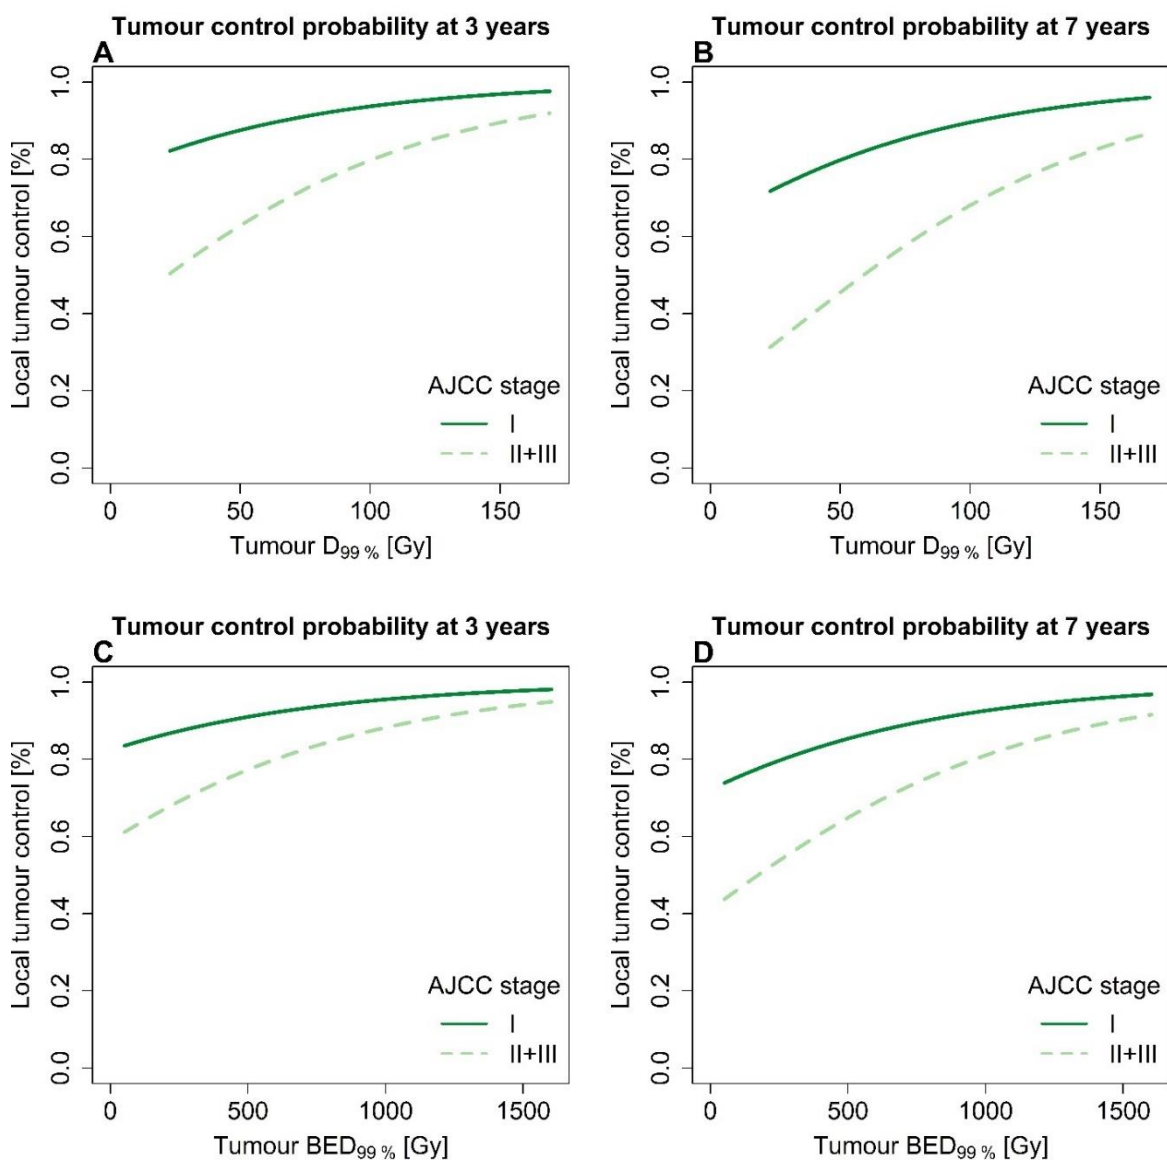

45

46 Figure 6: A) Tumour control probability (TCP) curves at 3 years divided into two groups based on  
 47 AJCC stage (AJCC stage I and AJCC stage II+III). B) TCP curves at 7 years divided into the same staging  
 48 groups. The TCP curves in A) and B) were built from Cox proportional hazard regressions, using age of  
 49 62 years (median age of cohort), and male sex (the most frequent sex in the cohort). C) TCP curves  
 50 using  $BED_{99\%}$  at 3 years divided into the three tumour heights. D) TCP curves using  $BED_{99\%}$  at 7 years  
 51 divided into the three tumour heights

52

### 53 Modelling using Biologically Effective Dose

54 Results from the  $BED_{99\%}$ -based TCP analyses for the models with tumour height and AJCC stage are  
 55 listed in Table 4. The latter is illustrated at 3 and 7 years after primary treatment in Figure 6C and  
 56 Figure 6D, respectively. Higher AJCC stage had larger risk of local tumour recurrence relative to  
 57 smaller stage.

Table 4: Cox proportional hazards using BED instead of physical dose

| Variables in full model       | Model with tumour height |         | Model with stage |         |
|-------------------------------|--------------------------|---------|------------------|---------|
|                               | HR (95% CI)              | p-value | HR (95% CI)      | p-value |
| Age                           | 1.02 (1.00-1.05)         | 0.08    | 1.02 (1.00-1.05) | 0.08    |
| Sex (male relative to female) | 2.44 (1.29-4.61)         | 0.006   | 2.35 (1.23-4.49) | 0.009   |
| Eye (left relative to right)  | 0.94 (0.54-1.66)         | 0.84    | 0.96 (0.55-1.70) | 0.89    |
| Tumour height                 | 1.17 (1.02-1.33)         | 0.02    | -                | -       |
| Optic disc-tumour distance    | 0.92 (0.81-1.04)         | 0.19    | 0.92 (0.81-1.04) | 0.16    |
| Stage II+III (relative to I)  | -                        | -       | 2.91 (1.41-6.00) | 0.004   |
| BED <sub>99%</sub>            | 0.99 (0.98-1.00)         | 0.003   | 0.98 (0.97-0.99) | 0.0005  |
| Combined TTT and Ru-106       | 1.77 (0.89-3.52)         | 0.10    | 2.30 (1.18-4.49) | 0.01    |
| Variables in reduced model    | HR (95% CI)              | p-value | HR (95% CI)      | p-value |
| BED <sub>99%</sub>            | 0.99 (0.98-0.99)         | 0.0005  | 0.98 (0.97-0.99) | 0.0001  |
| Sex (male relative to female) | 2.26 (1.24-4.11)         | 0.007   | 1.95 (1.06-3.58) | 0.03    |
| Stage II+III (relative to I)  | -                        | -       | 2.36 (1.18-4.72) | 0.02    |
| Combined TTT and Ru-106       | 2.25 (1.18-4.31)         | 0.01    | 2.48 (1.29-4.74) | 0.006   |

59 HR=hazard ratio, CI=confidence interval, BED<sub>99%</sub>=minimum biologically effective tumour dose,  
60 TTT=transpupillary thermotherapy, Ru-106=Ruthenium-106. HRs for a 10 Gy increase in BED<sub>99%</sub>

61

## 62 Choice of dose metric

63 The p-values from the reduced Cox model for the full range of dose metrics are plotted in Figure 7.  
64 D<sub>99%</sub> and BED<sub>99%</sub> had the strongest correlation, although most high dose metrics showed good  
65 correlation with outcome.

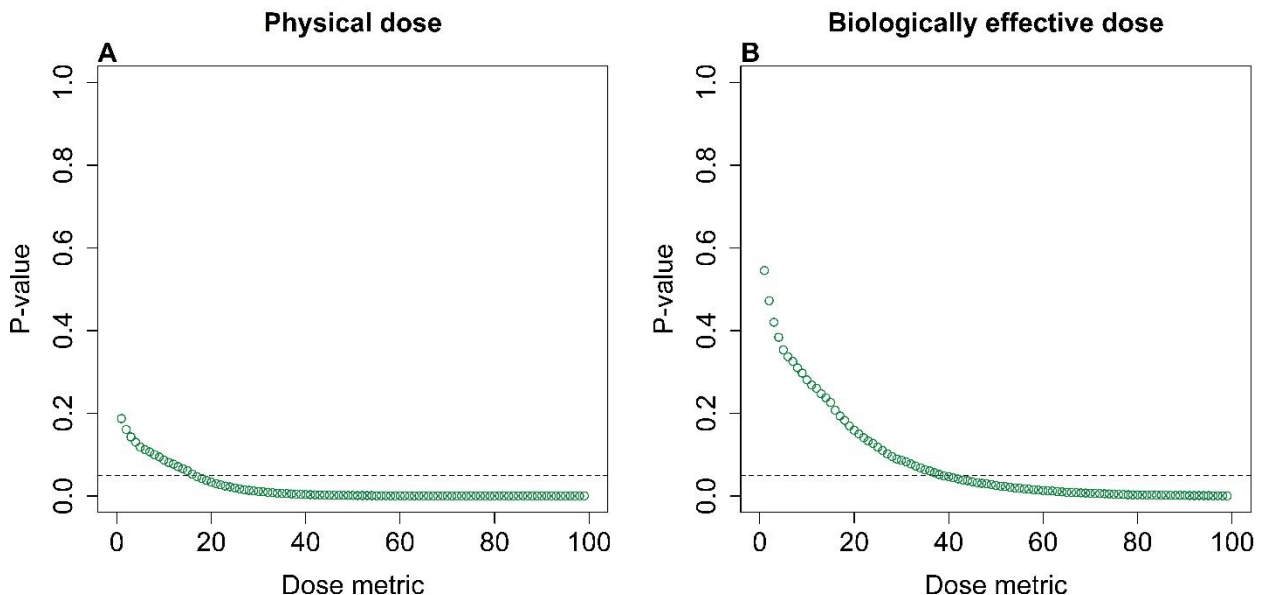

66

67 Figure 7: Significance of each dose metric ranging from D<sub>1%</sub>-D<sub>99%</sub> (A) and BED<sub>1%-99%</sub> (B). Dotted line  
68 indicates p=0.05.

69 **Competing risk analysis**

70 Competing risk analysis was performed to account for death and TTT during follow-up. The  
 71 cumulative incidences are illustrated in Figure 8.

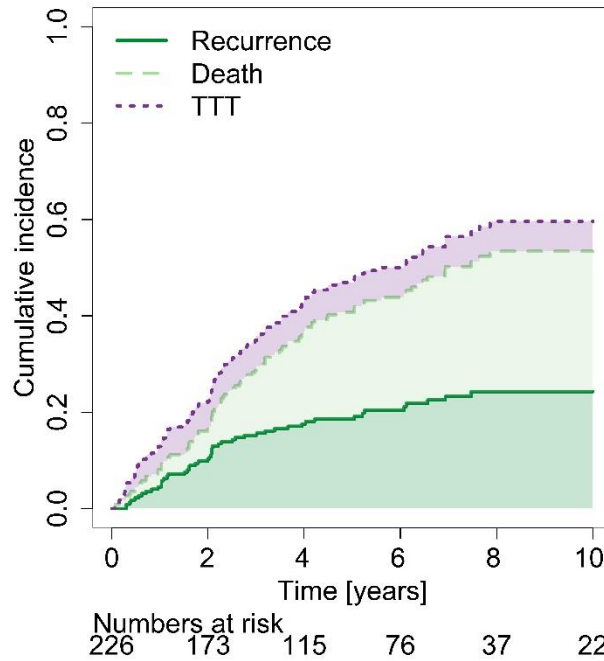

72

73 Figure 8: Cumulative incidences with death (light green), tumour recurrence without TTT (green), and  
 74 recurrence with TTT (purple) as competing events.

75

76 Taking competing risks into account did not change the overall model estimates. The hazard ratios and  
 77 corresponding p-values from the competing risk analysis are listed in Table 5.

78

Table 5: Reduced Cox proportional hazards accounting for competing risks.

| <b>Variables in reduced model</b> | <b>HR (95% CI)</b> | <b>p-value</b>    |
|-----------------------------------|--------------------|-------------------|
| D <sub>99%</sub>                  | 0.87 (0.82-0.92)   | <10 <sup>-4</sup> |
| Tumour height                     | 1.11 (0.99-1.25)   | 0.08              |
| Combined TTT and Ru-106           | 2.35 (1.26-4.37)   | 0.007             |
| Sex (male relative to female)     | 1.53 (0.88-2.65)   | 0.02              |

79 HR=hazard ratio, CI=confidence interval, D<sub>99%</sub>=minimum physical tumour dose, TTT=transpupillary  
 80 thermotherapy, Ru-106=Ruthenium-106. HRs for a 10 Gy increase in D<sub>99%</sub>

81

82

83

84

85 Considering marginal and central tumour recurrence (separating the two types of recurrence) as well  
 86 as death and TTT in follow-up as competing risks, the results appear to be driven primarily by central  
 87 recurrences. The cumulative incidences are illustrated in Figure 9. The hazard ratios and  
 88 corresponding p-values from the competing risk analysis are listed in Table 6 and Table 7.

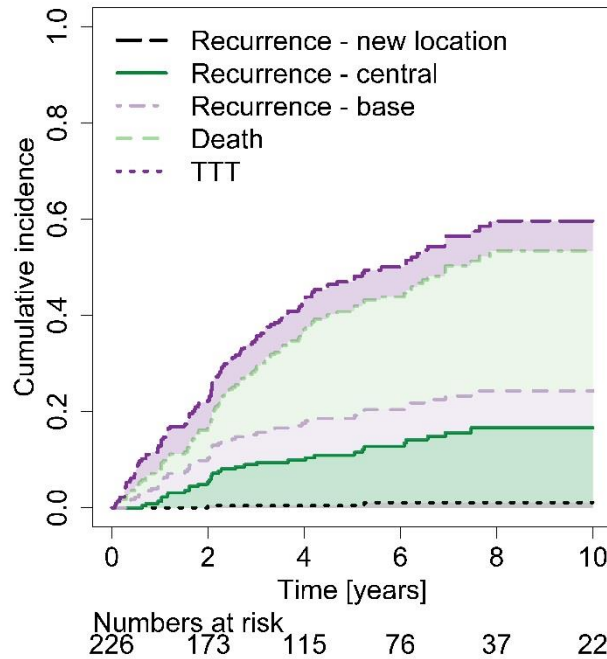

89  
 90 Figure 9: Cumulative incidences with tumour recurrence without TTT in a new location (black),  
 91 marginal tumour recurrence without TTT (dark green), death (light green), central tumour recurrence  
 92 without TTT (light purple), death (light green), and recurrence with TTT (dark purple) as competing  
 93 events.

94  
 95 Table 6: Reduced Cox proportional hazards accounting for competing risks and distinguishing  
 96 between different recurrence phenotypes.  
 97 Endpoint: Central recurrence

| Variables in reduced model    | HR (95% CI)      | p-value           |
|-------------------------------|------------------|-------------------|
| D <sub>99%</sub>              | 0.82 (0.76-0.89) | <10 <sup>-4</sup> |
| Tumour height                 | 1.15 (1.00-1.32) | 0.05              |
| Combined TTT and Ru-106       | 0.74 (0.33-1.66) | 0.47              |
| Sex (male relative to female) | 1.20 (0.57-2.55) | 0.63              |

98 HR=hazard ratio, CI=confidence interval, D<sub>99%</sub>=minimum physical tumour dose, TTT=transpupillary  
 99 thermotherapy, Ru-106=Ruthenium-106. HRs for a 10 Gy increase in D<sub>99%</sub>

100  
 101  
 102



103 Table 7: Reduced Cox proportional hazards accounting for competing risks and distinguishing  
 104 between different recurrence phenotypes.  
 105 Endpoint: Marginal recurrence

| Variables in reduced model    | HR (95% CI)      | p-value           |
|-------------------------------|------------------|-------------------|
| D <sub>99%</sub>              | 0.97 (0.91-1.04) | 0.39              |
| Tumour height                 | 1.04 (0.83-1.32) | 0.72              |
| Combined TTT and Ru-106       | 8.94 (3.17-25.2) | <10 <sup>-4</sup> |
| Sex (male relative to female) | 3.83 (1.43-10.2) | 0.63              |

106 HR=hazard ratio, CI=confidence interval, D<sub>99%</sub>=minimum physical tumour dose, TTT=transpupillary  
 107 thermotherapy, Ru-106=Ruthenium-106. HRs for a 10 Gy increase in D<sub>99%</sub>

108

109 **Calibration**

110 The calibration plots for predicted versus observed 3-year tumour control are illustrated in Figure 9  
 111 for both D<sub>99%</sub> and BED<sub>99%</sub>. The calibration analyses showed good correlation between observed and  
 112 predicted tumour control.

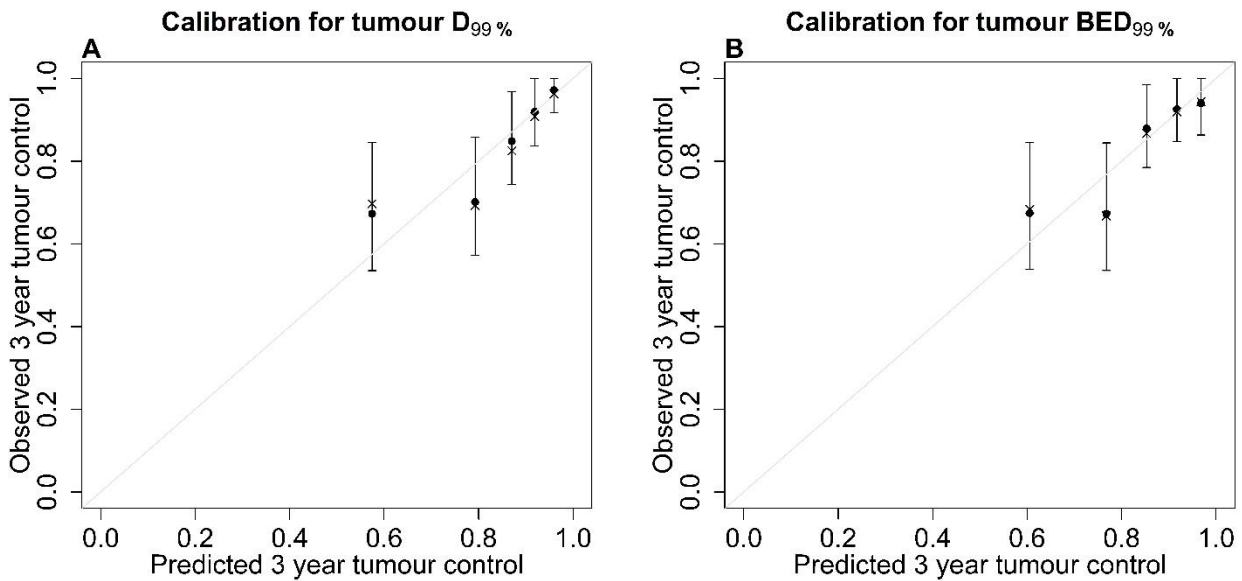

113

114 Figure 10: Calibration plots for predicted versus observed 3-year tumour control for the reduced Cox  
 115 model with D<sub>99%</sub> (A) and BED<sub>99%</sub> (B). The grey line represents perfect prediction. Intervals with  
 116 40 patients in each was used (and resampled 500 times to produce 95 % confidence intervals).
